# Supplementary material for: A Simplified Genomic Profiling Approach Predicts Outcome in Metastatic Colorectal Cancer
Source: PubMed Central journal article supplement (PMC6406354; doi:10.3390/cancers11020147), 2019-01-27
Supplement: cancers-11-00147-s001.pdf [file cancers-11-00147-s001.pdf]

## Supplementary Materials: A Simplified Genomic Profiling Approach Predicts outcome in Metastatic Colorectal Cancer

Carlo Capalbo, Francesca Belardinilli, Domenico Raimondo, Edoardo Milanetti, Umberto Malapelle, Pasquale Pisapia, Valentina Magri, Alessandra Prete, Silvia Pecorari, Mariarosaria Colella, Anna Coppa, Caterina Bonfiglio, Arianna Nicolussi, Virginia Valentini, Alessandra Tessitore, Beatrice Cardinali, Marialaura Petroni, Paola Infante, Matteo Santoni, Marco Filetti, Valeria Colicchia, Paola Paci, Silvia Mezi, Flavia Longo, Enrico Cortesi, Paolo Marchetti, Giancarlo Troncone, Diana Bellavia, Gianluca Canettieri and Giuseppe Giannini

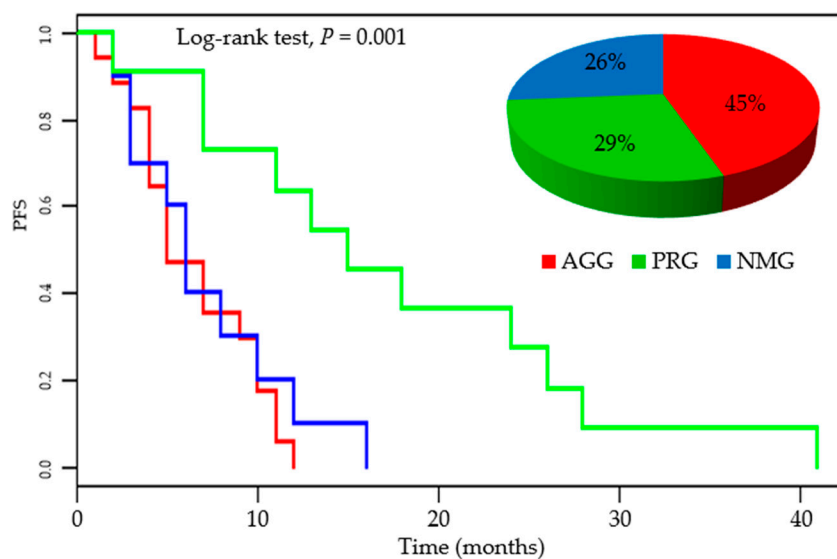

| Groups             | N° pz | Median PFS (months) | Comparisons | $p$ value |
|--------------------|-------|---------------------|-------------|-----------|
| Overall population | 38    | 7                   | AGG vs PRG  | <0.001    |
| AGG                | 17    | 5                   | AGG vs NMG  | 0.555     |
| PRG                | 11    | 15                  | PRG vs NMG  | 0.006     |
| NMG                | 10    | 6                   |             |           |

**Figure S1.** Kaplan–Meier plot showing the impact of PRG (green), AGG (red) and NMG (blue) group stratification on progression free survival (PFS) in the KRAS WT mCRCs.
